# Supplementary material for: The effect of common anticoagulants in detection and quantification of malaria parasitemia in human red blood cells by ATR-FTIR spectroscopy
Source: Royal Society of Chemistry journal article supplement (doi:10.1039/c6an02075e), 2016-11-28
Supplement: c6an02075e2.pdf [file c6an02075e2.pdf]

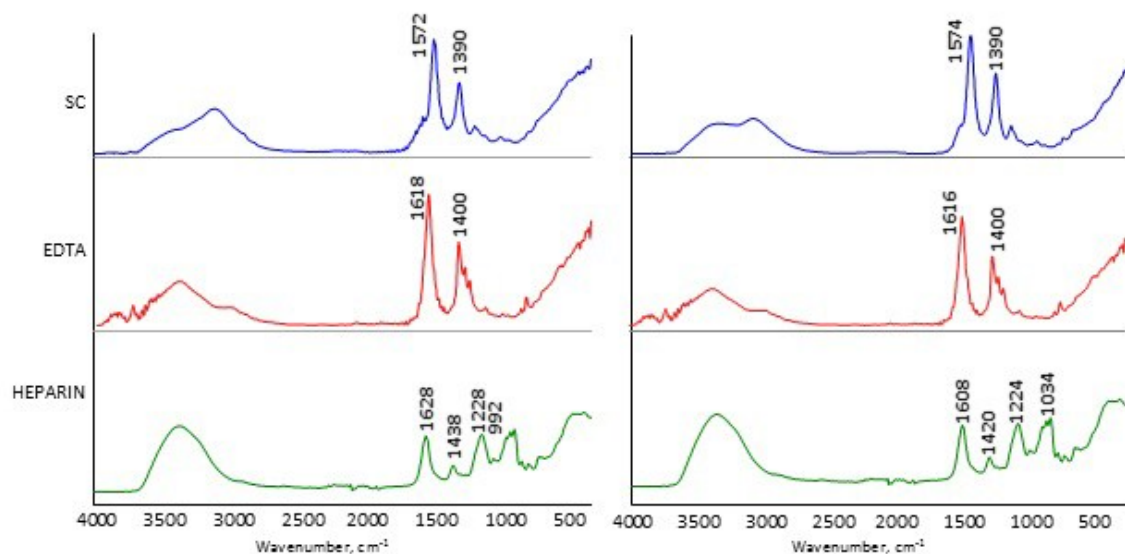

Supplementary Figure 1 Raw spectra of anticoagulants from extracted from blood vials (left) and analytical grade compound (right).
